# Supplementary material for: Pollution and health risk assessment of rare earth elements in Citrus sinensis growing soil in mining area of southern China
Source: PeerJ. 2023 Jun 6;11:e15470. doi: 10.7717/peerj.15470 (PMC10252884; doi:10.7717/peerj.15470)
Supplement: Data S1 [file peerj-11-15470-s002.xlsx]

## Sheet: Rare earth element in soil
	light rare earth element						heavy rare earth element
site	La	Ce	Pr	Nd	Sm	Eu	Gd	Tb	Dy	Ho	Er	Tm	Yb	Lu
1	68.04	101.4	15.28	53.78	10.6	2.25	10.85	1.92	11.9	2.37	6.7	1.05	6.79	1.09
1	51.03	103.6	12.22	44.73	8.85	1.81	8.68	1.41	8.76	1.75	5.21	0.85	5.87	0.94
1	67.17	112.8	15.59	54.89	9.96	1.99	9.28	1.48	8.45	1.67	4.79	0.74	4.89	0.76
1	105.6	122.7	23.97	85.1	16.67	3.42	15.63	2.58	15.47	3.02	8.56	1.33	8.48	1.38
1	124.3	136.5	27.58	97.62	18.88	4.08	18.82	3.23	19.52	3.8	10.52	1.65	10.57	1.74
1	202.7	149.2	42.16	145.2	24.76	4.78	20.45	3.07	16.81	3.15	8.75	1.3	8.42	1.36
1	235.7	144	48.92	168.8	29.94	5.84	25.59	4.11	23.44	4.51	12.81	1.95	12.85	2.14
1	39.09	101.7	8.05	27.61	5.06	1.01	4.79	0.73	4.43	0.87	2.6	0.45	2.97	0.49
1	58.61	144.1	13.59	48.25	7.87	1.43	6.43	0.92	5.39	1.11	3.42	0.58	4.06	0.68
1	57.34	101.5	12.62	44.69	8.05	1.64	7.64	1.18	7.13	1.45	4.17	0.68	4.55	0.76
1	89.45	127.4	19.57	69.53	12.36	2.44	11.32	1.75	10.33	2	5.88	0.93	6	1.04
1	88.16	136.6	19.97	71.47	13.38	2.56	11.66	1.82	10.7	2.08	5.95	0.94	6.09	0.99
1	236.5	132.3	47.41	163.4	30.15	6.11	27.02	4.23	23.79	4.51	12.28	1.86	11.92	1.93
1	82.46	90.02	16.95	58.87	10.45	2.08	9.47	1.52	9.07	1.78	5.21	0.84	5.38	0.85
1	142.7	86.34	27.96	95.56	19.23	4.19	20.31	3.64	21.95	4.22	11.81	1.79	11.3	1.82
2	76.96	130.6	16.71	60.62	10.82	2.16	9.88	1.44	8.23	1.61	4.58	0.7	4.45	0.7
2	48.75	88.18	10.35	36.89	6.82	1.27	6.48	1.07	6.67	1.35	4.06	0.66	4.47	0.73
2	22.24	46.99	4.23	14.38	2.52	0.58	2.22	0.33	1.83	0.35	0.97	0.16	1	0.17
2	25.08	50.61	4.56	14.75	2.55	0.64	2.24	0.32	1.64	0.27	0.67	0.1	0.6	0.09
2	37.29	64.51	7.96	29.01	5.1	1.2	4.42	0.66	3.82	0.71	2.09	0.34	2.25	0.38
2	54.7	71.48	11.67	41.96	7.5	1.84	6.75	1.01	6	1.22	3.49	0.59	3.82	0.64
2	55.55	90.64	11.66	41.88	6.12	1.26	4.4	0.59	2.95	0.54	1.61	0.25	1.76	0.3
2	15.01	31.53	2.49	7.92	1.23	0.28	1.11	0.16	0.83	0.15	0.43	0.07	0.49	0.09
2	22.35	48.89	4.15	14.27	2.62	0.6	2.26	0.33	1.82	0.33	1.01	0.17	1.11	0.19
2	19.88	46.82	3.78	13.12	2.38	0.56	2.12	0.31	1.75	0.34	0.96	0.16	1.2	0.21
2	25.58	42.8	4.63	15.1	2.64	0.64	2.31	0.34	1.87	0.33	0.87	0.14	0.96	0.17
2	71.03	103.9	16.46	61.32	12.28	3.22	12.33	1.97	11.58	2.33	6.54	1.02	6.61	1.06
2	50.09	79.3	10.45	37.45	7.16	1.79	6.15	0.96	5.52	1.06	3.11	0.51	3.57	0.56
2	40.1	79.8	9.04	33.6	6.47	1.63	6.13	0.95	5.45	1.08	3.13	0.5	3.23	0.52
2	42.36	89.55	9.38	34.62	6.62	1.66	6.39	0.95	5.35	1.04	2.92	0.46	2.89	0.46
3	36.64	171.7	9.9	38.21	9.92	0.66	9.06	1.58	10.8	2.38	7.65	1.38	9.59	1.56
3	191.2	256.1	44.1	151.7	30.31	1.87	24.94	3.95	22.12	4.23	11.97	1.87	11.81	1.78
3	71.67	128.9	18.75	67.01	13.26	0.46	9.91	1.55	9.2	1.84	5.58	0.92	6.03	0.95
3	107.2	140.8	23.62	82.28	15.76	1.01	12.98	2.11	12.69	2.47	7.11	1.14	7.18	1.14
3	96.28	129.4	19.47	66.95	12.67	1.23	11.93	2.01	12.29	2.48	7.13	1.12	7.09	1.11
3	103.3	187.6	23.45	86.85	19.03	1.96	19.05	3.28	21.13	4.36	12.66	1.99	12.87	2.03
3	132.2	156.9	29.35	103.3	19.21	2.21	16.96	2.68	15.17	2.84	7.77	1.17	7.04	1.1
3	86.39	120.2	19.98	70.95	16.31	0.61	16.08	2.99	18.78	3.8	10.91	1.73	10.81	1.66
3	101.4	168.6	18.51	61.47	12.68	1.09	13.94	2.5	16.3	3.33	9.7	1.62	10.34	1.64
3	109.9	231.2	28.42	111.4	22.77	2.86	19.08	3.05	18.44	3.63	10.49	1.61	10.1	1.56
3	30.1	190.9	7.09	25.25	5.9	0.59	6.99	1.3	9.27	2.12	6.67	1.16	8.28	1.35
3	98.24	189.8	23.55	89.87	19.55	4.35	20.22	3.42	21.41	4.19	11.88	1.87	11.83	1.88
3	87.36	157.9	22.49	90.51	19.57	4.88	20.03	3.36	20.59	4.11	11.43	1.76	10.98	1.78
3	45.44	111	11.23	42.04	9.66	1.5	10.7	1.97	13.45	2.82	8.44	1.43	9.54	1.56
3	58.92	146.7	14.39	55.1	12.31	2.27	12.14	2.03	12.53	2.55	7.4	1.21	8.01	1.27
4	20.58	161.9	5.02	18.86	3.42	0.28	3.92	0.55	3.6	0.75	2.32	0.4	2.6	0.43
4	16.22	161.4	4.39	16.45	3.41	0.24	4.16	0.64	4.39	0.9	2.65	0.45	2.79	0.43
4	8.7	120.7	2.08	7.43	1.63	0.11	2.37	0.38	2.8	0.61	1.87	0.33	2.15	0.34
4	9.85	204.3	2.12	7.62	1.56	0.14	2.84	0.35	2.35	0.54	1.76	0.31	2.12	0.35
4	15.29	59.67	3.01	10.42	1.69	0.37	1.76	0.26	1.64	0.36	1.12	0.22	1.45	0.23
4	19.53	70.61	4.53	16.15	3.04	0.3	2.97	0.44	2.72	0.56	1.66	0.27	1.7	0.28
4	14.96	65.76	3.34	11.99	2.35	0.19	2.71	0.45	3.05	0.66	1.97	0.34	2.28	0.36
4	56	153.5	13.66	49.58	9.77	0.99	8.95	1.41	8.51	1.66	4.55	0.71	4.35	0.66
4	46.45	136	10.46	37.64	7.19	0.65	7.04	1.13	6.94	1.38	3.99	0.62	3.77	0.58
4	35.35	88.67	8	28.78	5.52	1.03	4.79	0.74	4.36	0.82	2.36	0.38	2.35	0.37
4	28.9	119.4	7.4	28.22	6.65	0.84	6.85	1.17	7.54	1.48	4.31	0.66	4.35	0.65
4	78.12	188.5	17.32	63.83	12.53	1.3	11.32	1.73	9.95	1.86	5.14	0.74	4.54	0.71
4	85.4	167.4	19.56	72.21	14.15	1.51	13.56	2.12	12.23	2.27	6.17	0.9	5.59	0.87
4	59.68	92.76	16.15	62.72	15.28	1.29	13.89	2.48	14.25	2.63	6.91	1	6.1	0.89
4	130	209	26.28	89.02	13.93	1.41	11.71	1.65	8.95	1.68	4.61	0.68	4.06	0.62
5	37.8	116	8.94	33.6	6.32	1.24	6.17	0.91	5.9	1.15	3.47	0.53	3.46	0.55
5	30.7	61.2	6.23	21.8	3.53	0.75	3.35	0.53	3.44	0.71	2.24	0.38	2.49	0.38
5	18.6	44.5	3.86	14.3	2.84	0.61	3.16	0.59	4.28	0.92	2.77	0.46	3.72	0.48
5	26.9	51.1	5.42	18.7	3.15	0.66	3.3	0.6	4.38	0.89	2.76	0.46	3.01	0.46
5	71.4	144	15.8	58.3	10.4	1.84	8.88	1.19	6.68	1.2	3.74	0.55	3.48	0.52
5	38.8	79	8.47	30.6	5.35	1.06	5.13	0.8	4.94	0.97	2.9	0.46	2.92	0.45
5	56.9	116	12.8	47.3	8.13	1.49	7.44	1.07	6.25	1.16	3.49	0.52	3.45	0.52
5	41	84.2	9.18	33.4	5.89	1.05	5.34	0.78	4.61	0.89	2.72	0.44	2.7	0.41
5	35.2	69.9	7.73	27.6	5.06	0.91	4.62	0.72	4.66	0.91	2.81	0.45	2.83	0.44
5	35.2	72.6	8.22	30.2	5.48	1.07	5.04	0.76	4.66	0.89	2.64	0.41	2.67	0.43
5	28.6	55.9	6.47	23.1	4.1	0.74	3.68	0.58	3.4	0.65	2	0.31	1.99	0.29
5	32	64.8	7.33	26.7	4.84	0.84	4.5	0.69	4.42	0.88	3.16	0.4	2.46	0.38
5	37.1	75.2	8.49	30.2	5.06	0.9	4.61	0.67	4.09	0.76	2.26	0.35	2.26	0.33
5	55.2	107	13.1	48.4	8.86	1.3	7.93	1.22	7.66	1.45	4.32	0.73	4.67	0.69
5	38.7	73	9.3	35.4	7.11	1.46	6.77	1.09	6.66	1.3	3.89	0.62	3.98	0.6
	μg/g	μg/g	μg/g	μg/g	μg/g	μg/g	μg/g	μg/g	μg/g	μg/g	μg/g	μg/g	μg/g	μg/g
									64.28
									114.1
									14.24
									51.06
									9.82
									1.59
									9.15
									1.47
									8.88
									1.75
									5.05
									0.8
									5.15
									0.82

## Sheet: Soil properties
site	Al2O3	TFe2O3	MgO	CaO	Na2O	K2O	pH	TOC
1	19.87	3.69	0.39	0.05	0.18	4.83	4.83	0.43
1	20.68	4.35	0.36	0.25	0.17	4.24	5.18	0.9
1	20.38	4.03	0.51	0.08	0.19	5.27	5.03	0.34
1	20.07	3.87	0.42	0.08	0.18	4.98	5.08	0.56
1	23.05	3.91	0.36	0.06	0.16	5.04	4.8	0.51
1	22.62	4.52	0.25	0.06	0.11	2.24	4.72	0.41
1	23.23	4.3	0.44	0.09	0.13	3.93	5.02	0.65
1	19.81	4.02	0.27	0.09	0.09	1.56	4.91	1.36
1	23.82	4.74	0.29	0.06	0.08	1.61	4.96	0.71
1	22.18	4.05	0.28	0.06	0.13	3.04	4.91	2.16
1	21.34	4.43	0.68	0.09	0.27	4.87	5.33	0.57
1	20.69	4.13	0.38	0.09	0.31	5.33	4.78	0.66
1	20.6	4.14	0.31	0.09	0.17	4.65	4.87	0.71
1	20.36	4.19	0.41	0.7	0.18	4.76	7.05	1.4
1	21.24	3.92	0.24	0.11	0.17	4.7	5.21	0.52
2	15.67	4.95	0.4	0.15	0.13	1.85	5.11	1.91
2	14.15	4.66	0.32	0.17	0.12	1.45	5.81	1.5
2	23.52	7.48	0.28	0.08	0.09	0.97	4.39	1.6
2	24.36	6.74	0.19	0.06	0.06	1.01	4.89	1.24
2	19.75	5.87	0.27	0.06	0.06	0.93	4.92	1.01
2	21.41	6	0.37	0.08	0.1	1.31	4.79	0.51
2	24.86	6.54	0.29	0.06	0.09	0.99	4.82	0.96
2	21.2	4.79	0.19	0.08	0.08	0.69	4.54	1.24
2	22.69	6.1	0.27	0.09	0.08	0.81	4.99	0.76
2	24.48	8.2	0.32	0.08	0.08	0.58	4.95	1.07
2	21.44	5.78	0.24	0.08	0.08	0.97	4.69	1.64
2	22.88	6.78	0.48	0.09	0.1	1.69	4.83	0.92
2	20.54	7.64	0.43	0.08	0.11	1.89	4.13	0.62
2	20.87	7.84	0.73	0.08	0.17	3.17	4.62	1.07
2	25.23	9.89	0.4	0.06	0.1	1.15	4.83	1.02
3	20.56	3.93	0.21	0.17	0.23	2.53	5.13	2.43
3	15.82	2.18	0.24	0.62	0.3	3.84	6.7	2.27
3	16.64	1.9	0.18	0.17	0.15	1.96	4.97	1.6
3	12.61	2.39	0.22	0.22	0.26	3.98	5.14	1.13
3	11.66	2.71	0.25	0.16	0.28	4.07	4.62	1.79
3	18.34	4.51	0.31	0.25	0.18	3.26	4.85	1.85
3	12.45	3.62	0.23	0.15	0.17	2.57	5.02	1.84
3	14.98	2.55	0.23	0.09	0.34	5.05	4.8	0.97
3	21.95	4.26	0.29	0.06	0.17	3.56	4.92	1.11
3	22.45	6.94	0.18	0.06	0.1	1.07	4.74	1.29
3	24.42	5.03	0.19	0.06	0.09	0.81	4.48	1.5
3	22.37	14.88	0.76	0.08	0.1	2.01	5.16	1.64
3	19.9	13.9	0.87	0.08	0.09	2.09	4.87	1.04
3	16.63	5.08	0.31	0.06	0.1	2.1	4.89	1.29
3	23.34	12.74	0.42	0.12	0.09	1.15	5.06	1.98
4	22.58	3.11	0.15	0.09	0.08	0.27	4.66	1.86
4	18.63	2.29	0.09	0.06	0.08	0.18	4.28	1.16
4	22.16	2.78	0.08	0.05	0.06	0.12	4.14	1.38
4	24.75	3.56	0.11	0.1	0.06	0.15	4.65	1.38
4	10.72	1.61	0.1	0.15	0.68	1.5	4.55	1.8
4	13.96	2.22	0.12	0.13	0.37	0.88	4.51	1.94
4	21.17	3.91	0.12	0.06	0.19	0.41	4.27	0.89
4	16.17	2	0.25	0.14	0.9	3.47	4.86	1.13
4	19.39	3.02	0.15	0.11	0.23	0.73	4.62	1.33
4	13.87	1.74	0.19	0.21	1.89	4.22	4.93	1.15
4	15.71	2.37	0.25	0.14	1.14	2.77	4.56	1.73
4	19.84	3.46	0.27	0.18	0.71	2.08	4.49	1.5
4	17.36	2.16	0.32	0.26	1.15	3.45	4.43	1.88
4	12.98	2.1	0.25	0.25	1.02	3.94	4.84	1.55
4	14.66	2.35	0.18	0.17	0.63	1.95	4.81	1.56
5	16.8	5.5	0.87	0.21	0.1	2.72	5.91	1.55
5	17.68	5.27	1.02	0.16	0.093	1.59	5.35	1.83
5	15.66	4.36	0.74	0.1	0.081	2.07	5.2	0.71
5	17.16	5.27	0.95	0.15	0.11	2.07	5.14	1.28
5	13.2	2.43	0.85	0.27	0.23	2.44	5.66	1.47
5	14.94	4.13	1.36	0.71	0.16	2.68	6.7	1.52
5	11.14	3.66	0.68	0.26	0.17	2	5.7	1.52
5	12.22	3.34	1.23	0.33	0.3	2.68	6.57	0.81
5	13.68	3.5	0.89	0.46	0.17	2.1	6.18	1.22
5	15.18	4.21	3.21	3.36	0.78	3.73	8.08	1.31
5	8.87	1.96	0.72	0.27	0.36	2.24	6.4	0.81
5	9.64	2.39	0.52	0.21	0.18	1.53	5.15	0.91
5	13.12	2.99	1.63	0.36	0.46	3.23	4.85	1.36
5	13.11	3.29	0.84	0.23	0.33	2.8	5.35	0.71
5	17.26	3.89	1.17	0.11	0.091	2.32	4.72	0.45

## Sheet: Rare earth element in fruit
	light rare earth element						heavy rare earth element
site	La	Ce	Pr	Nd	Sm	Eu	Gd	Tb	Dy	Ho	Er	Tm	Yb	Lu
1	68.04	101.4	15.28	53.78	10.6	2.25	10.85	1.92	11.9	2.37	6.7	1.05	6.79	1.09
1	51.03	103.6	12.22	44.73	8.85	1.81	8.68	1.41	8.76	1.75	5.21	0.85	5.87	0.94
1	67.17	112.8	15.59	54.89	9.96	1.99	9.28	1.48	8.45	1.67	4.79	0.74	4.89	0.76
1	105.6	122.7	23.97	85.1	16.67	3.42	15.63	2.58	15.47	3.02	8.56	1.33	8.48	1.38
1	124.3	136.5	27.58	97.62	18.88	4.08	18.82	3.23	19.52	3.8	10.52	1.65	10.57	1.74
1	202.7	149.2	42.16	145.2	24.76	4.78	20.45	3.07	16.81	3.15	8.75	1.3	8.42	1.36
1	235.7	144	48.92	168.8	29.94	5.84	25.59	4.11	23.44	4.51	12.81	1.95	12.85	2.14
1	39.09	101.7	8.05	27.61	5.06	1.01	4.79	0.73	4.43	0.87	2.6	0.45	2.97	0.49
1	58.61	144.1	13.59	48.25	7.87	1.43	6.43	0.92	5.39	1.11	3.42	0.58	4.06	0.68
1	57.34	101.5	12.62	44.69	8.05	1.64	7.64	1.18	7.13	1.45	4.17	0.68	4.55	0.76
1	89.45	127.4	19.57	69.53	12.36	2.44	11.32	1.75	10.33	2	5.88	0.93	6	1.04
1	88.16	136.6	19.97	71.47	13.38	2.56	11.66	1.82	10.7	2.08	5.95	0.94	6.09	0.99
1	236.5	132.3	47.41	163.4	30.15	6.11	27.02	4.23	23.79	4.51	12.28	1.86	11.92	1.93
1	82.46	90.02	16.95	58.87	10.45	2.08	9.47	1.52	9.07	1.78	5.21	0.84	5.38	0.85
1	142.7	86.34	27.96	95.56	19.23	4.19	20.31	3.64	21.95	4.22	11.81	1.79	11.3	1.82
2	76.96	130.6	16.71	60.62	10.82	2.16	9.88	1.44	8.23	1.61	4.58	0.7	4.45	0.7
2	48.75	88.18	10.35	36.89	6.82	1.27	6.48	1.07	6.67	1.35	4.06	0.66	4.47	0.73
2	22.24	46.99	4.23	14.38	2.52	0.58	2.22	0.33	1.83	0.35	0.97	0.16	1	0.17
2	25.08	50.61	4.56	14.75	2.55	0.64	2.24	0.32	1.64	0.27	0.67	0.1	0.6	0.09
2	37.29	64.51	7.96	29.01	5.1	1.2	4.42	0.66	3.82	0.71	2.09	0.34	2.25	0.38
2	54.7	71.48	11.67	41.96	7.5	1.84	6.75	1.01	6	1.22	3.49	0.59	3.82	0.64
2	55.55	90.64	11.66	41.88	6.12	1.26	4.4	0.59	2.95	0.54	1.61	0.25	1.76	0.3
2	15.01	31.53	2.49	7.92	1.23	0.28	1.11	0.16	0.83	0.15	0.43	0.07	0.49	0.09
2	22.35	48.89	4.15	14.27	2.62	0.6	2.26	0.33	1.82	0.33	1.01	0.17	1.11	0.19
2	19.88	46.82	3.78	13.12	2.38	0.56	2.12	0.31	1.75	0.34	0.96	0.16	1.2	0.21
2	25.58	42.8	4.63	15.1	2.64	0.64	2.31	0.34	1.87	0.33	0.87	0.14	0.96	0.17
2	71.03	103.9	16.46	61.32	12.28	3.22	12.33	1.97	11.58	2.33	6.54	1.02	6.61	1.06
2	50.09	79.3	10.45	37.45	7.16	1.79	6.15	0.96	5.52	1.06	3.11	0.51	3.57	0.56
2	40.1	79.8	9.04	33.6	6.47	1.63	6.13	0.95	5.45	1.08	3.13	0.5	3.23	0.52
2	42.36	89.55	9.38	34.62	6.62	1.66	6.39	0.95	5.35	1.04	2.92	0.46	2.89	0.46
5	37.8	116	8.94	33.6	6.32	1.24	6.17	0.91	5.9	1.15	3.47	0.53	3.46	0.55
5	30.7	61.2	6.23	21.8	3.53	0.75	3.35	0.53	3.44	0.71	2.24	0.38	2.49	0.38
5	18.6	44.5	3.86	14.3	2.84	0.61	3.16	0.59	4.28	0.92	2.77	0.46	3.72	0.48
5	26.9	51.1	5.42	18.7	3.15	0.66	3.3	0.6	4.38	0.89	2.76	0.46	3.01	0.46
5	71.4	144	15.8	58.3	10.4	1.84	8.88	1.19	6.68	1.2	3.74	0.55	3.48	0.52
5	38.8	79	8.47	30.6	5.35	1.06	5.13	0.8	4.94	0.97	2.9	0.46	2.92	0.45
5	56.9	116	12.8	47.3	8.13	1.49	7.44	1.07	6.25	1.16	3.49	0.52	3.45	0.52
5	41	84.2	9.18	33.4	5.89	1.05	5.34	0.78	4.61	0.89	2.72	0.44	2.7	0.41
5	35.2	69.9	7.73	27.6	5.06	0.91	4.62	0.72	4.66	0.91	2.81	0.45	2.83	0.44
5	35.2	72.6	8.22	30.2	5.48	1.07	5.04	0.76	4.66	0.89	2.64	0.41	2.67	0.43
5	28.6	55.9	6.47	23.1	4.1	0.74	3.68	0.58	3.4	0.65	2	0.31	1.99	0.29
5	32	64.8	7.33	26.7	4.84	0.84	4.5	0.69	4.42	0.88	3.16	0.4	2.46	0.38
5	37.1	75.2	8.49	30.2	5.06	0.9	4.61	0.67	4.09	0.76	2.26	0.35	2.26	0.33
5	55.2	107	13.1	48.4	8.86	1.3	7.93	1.22	7.66	1.45	4.32	0.73	4.67	0.69
5	38.7	73	9.3	35.4	7.11	1.46	6.77	1.09	6.66	1.3	3.89	0.62	3.98	0.6
	μg/g	μg/g	μg/g	μg/g	μg/g	μg/g	μg/g	μg/g	μg/g	μg/g	μg/g	μg/g	μg/g	μg/g
